# Supplementary material for: Microwave shock-driven thermal engineering of unconventional cubic 2D LaMnO3 for efficient oxygen evolution
Source: Royal Society of Chemistry journal article supplement (doi:10.1039/d5ta01034a), 2025-01-01
Supplement: d5ta01034a1.pdf [file d5ta01034a1.pdf]

## Supporting information

### Microwave shock-driven thermal engineering of unconventional cubic 2D LaMnO<sub>3</sub> for efficient oxygen evolution

Jiao Dai,<sup>‡a</sup> Mingjie Wang,<sup>‡a,c</sup> Haoran Tian,<sup>‡a</sup> Wenhui Fan,<sup>a</sup> Kaisi Liu,<sup>a</sup> Weilin Xu,<sup>a</sup>  
Huiyu Jiang,<sup>\*b</sup> Huanyu Jin,<sup>\*c</sup> and Jun Wan<sup>\*a</sup>

<sup>a</sup> State Key Laboratory of New Textile Materials and Advanced Processing Technologies, School of Chemistry and Chemical Engineering, Wuhan Textile University, Wuhan 430200, China.

<sup>b</sup> School of Textile Science and Engineering, Wuhan Textile University, Wuhan 430200, China.

<sup>c</sup> Institute of Technology for Carbon Neutrality, Shenzhen Institute of Advanced Technology, Chinese Academy of Sciences, Shenzhen, 518055, China.

<sup>‡</sup> These authors contributed equally to the work.

**\* Correspondence to:** Prof. Jun Wan, State Key Laboratory of New Textile Materials and Advanced Processing Technologies, Wuhan Textile University, 1 Sunshine Avenue, Jiangxia District, Wuhan 430200, Hubei, China. E-mail: [wanj@wtu.edu.cn](mailto:wanj@wtu.edu.cn);  
Prof. Huiyu Jiang, School of Textile Science and Engineering, Wuhan Textile University, 1 Sunshine Avenue, Jiangxia District, Wuhan 430200, Hubei, China. E-mail: [huiyujiang@wtu.edu.cn](mailto:huiyujiang@wtu.edu.cn);  
Prof. Huanyu Jin, Shenzhen Institute of Advanced Technology, Chinese Academy of Sciences, Shenzhen, 518055, China. E-mail: [hy.jin2@siat.ac.cn](mailto:hy.jin2@siat.ac.cn)

## ***Supplementary Materials***

**1. Figure. S1 to S14**

**2. Table S1 to S3**

**1. Figure. S1 to S12**

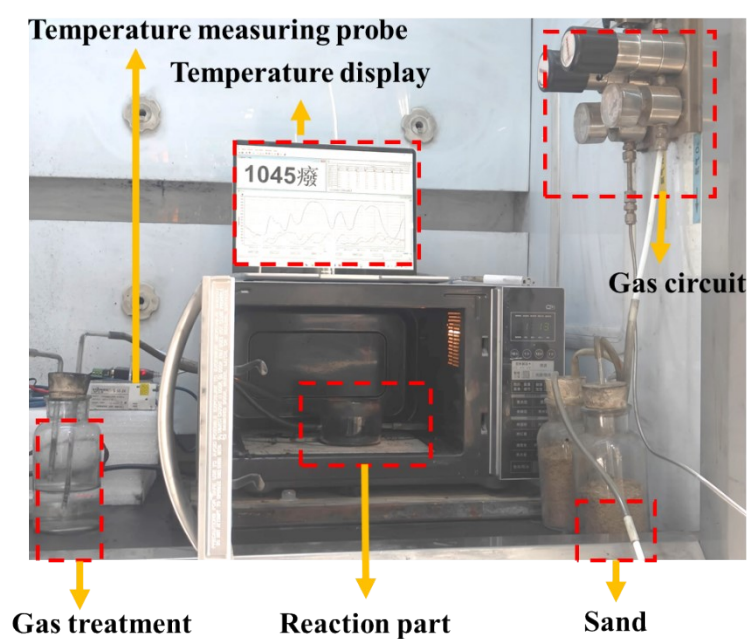

**Fig. S1** Physical picture of microwave impact equipment.

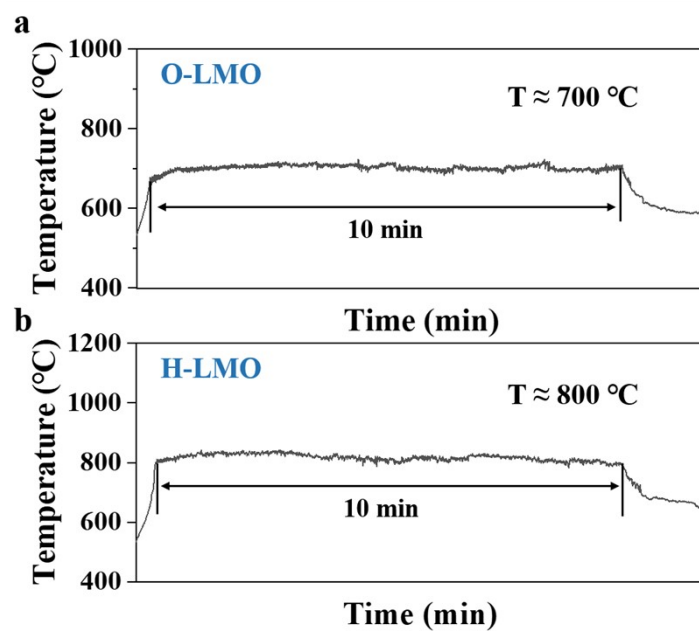

**Fig. S2** Infrared real-time monitoring of O-LMO and H-LMO temperature map.

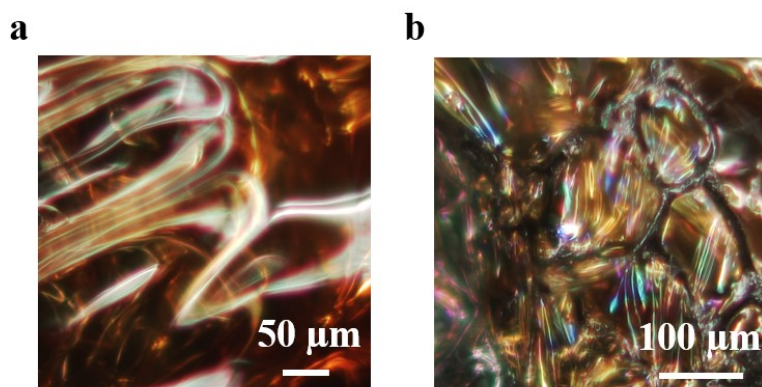

**Fig. S3** Optical microscopy images during the synthesis process.

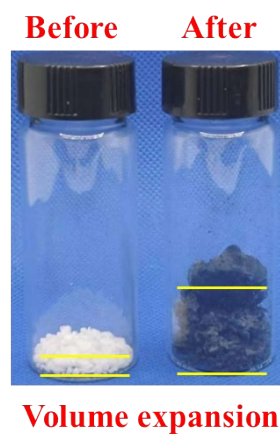

**Fig. S4** Physical-optical photographs before and after the reaction.

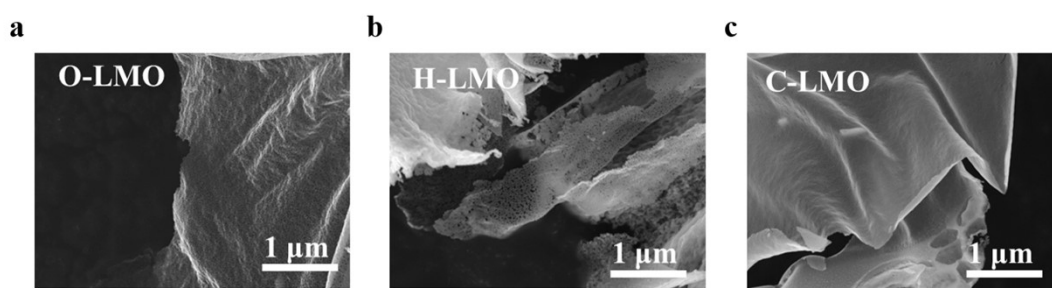

**Fig. S5** SEM image of LMO.

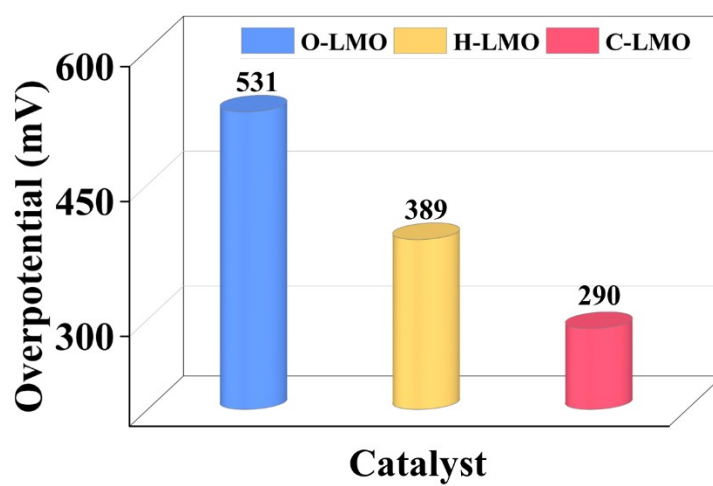

**Fig. S6** Overpotential statistics of O-LMO, H-LMO, C-LMO.

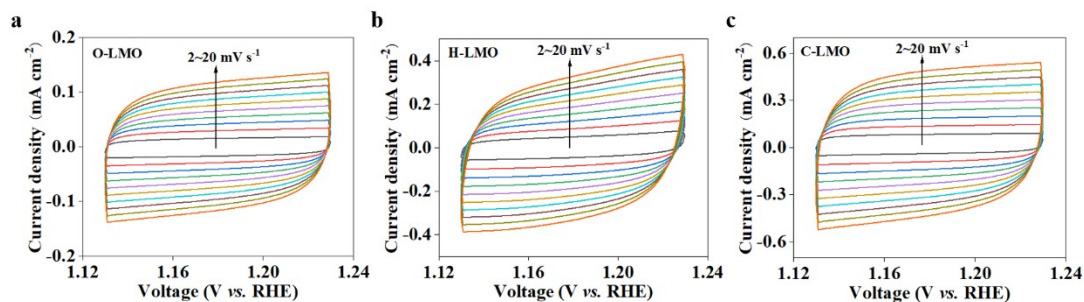

**Fig. S7** CV measurements in a non-faradic current region (1.13-1.23V) at scan rates of 2 to 20  $\text{mV s}^{-1}$  of (a) O-LMO, (b) H-LMO, (c) C-LMO in  $\text{N}_2$ -saturated 1.0 M KOH solution.

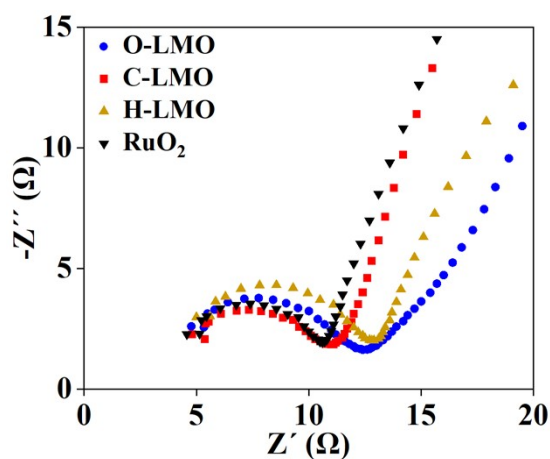

**Fig. S8** Nyquist plots of O-LMO, H-LMO, C-LMO and  $\text{RuO}_2$  catalysts.

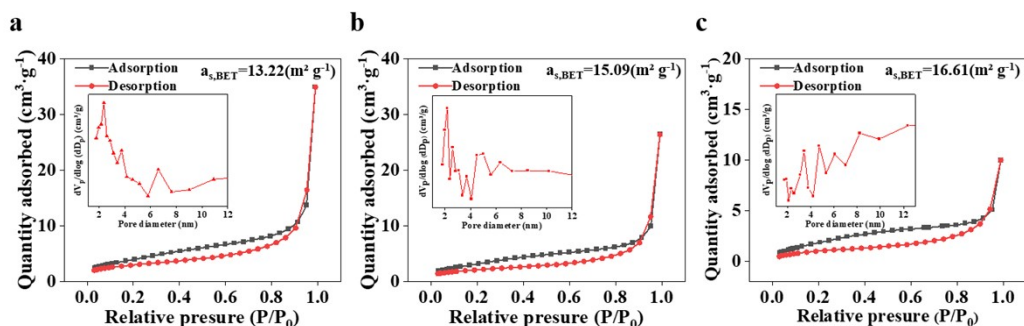

**Fig. S9** BET diagram for (a) O-LMO, (b) H-LMO and (c) C-LMO.

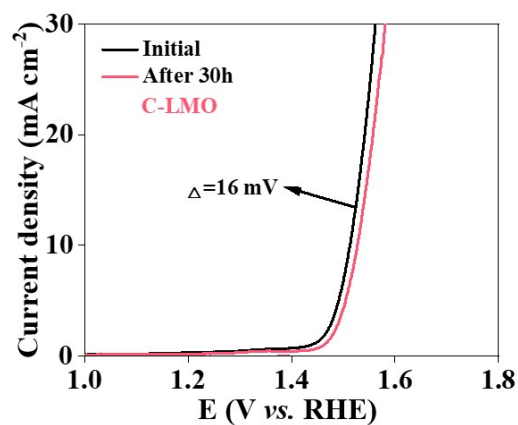

**Fig. S10** The durability tests of C-LMO catalysts.

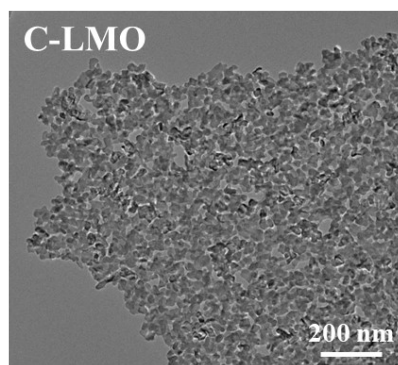

**Fig. S11** TEM images of C-LMO catalysts after durability tests.

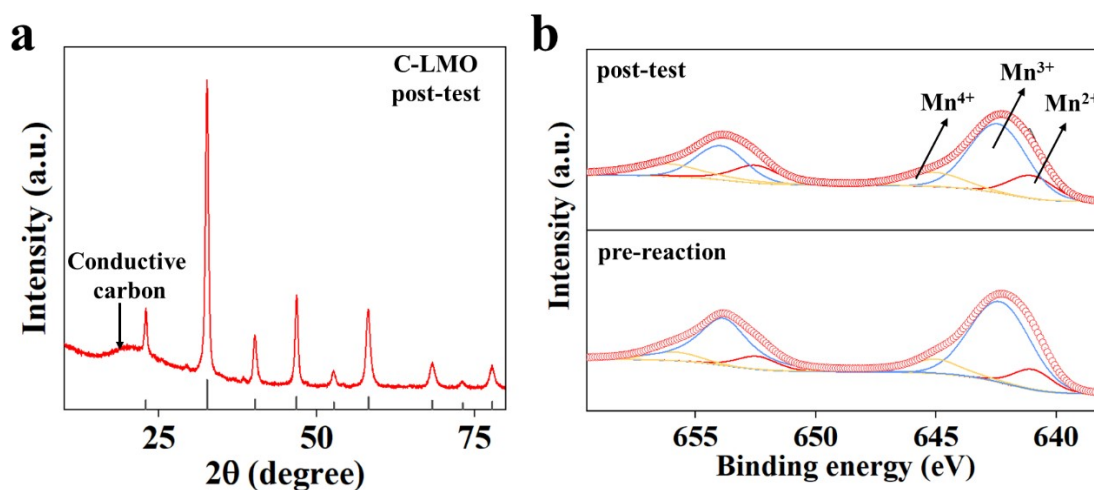

**Fig. S12** (a) XRD features images of C-LMO catalysts after durability tests, (b) Mn 2p XPS Data before and after durability testing.

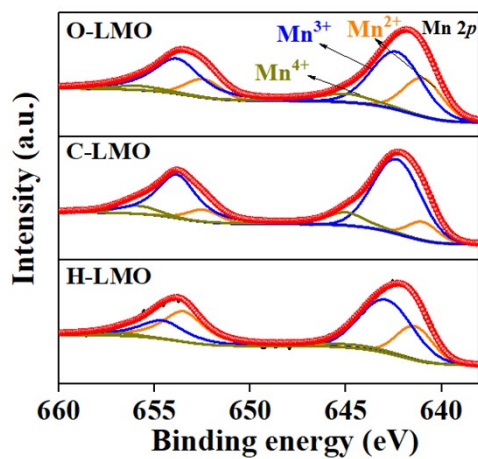

**Fig. S13** High-resolution XPS spectra of Mn 2p features of O-LMO, H-LMO, C-LMO catalysts.

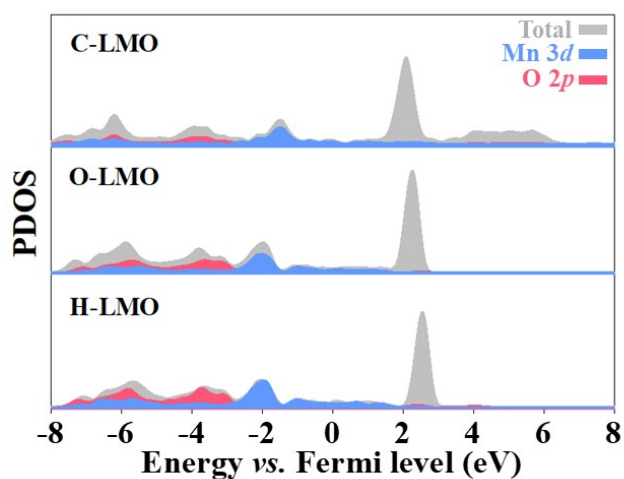

**Fig. S14** Comprehensive PDOS for various elements in O-LMO, H-LMO, C-LMO catalysts.

## 2. Table S1 to S3

**Table S1.** The OER performance comparison of different catalysts.

|                  | Electrocatalysts                                       | Mass loading<br>(mg cm <sup>-1</sup> ) | Overpotential<br>(mV vs. RHE) | Tafel slope<br>(mV dec <sup>-1</sup> ) | reference                                 |
|------------------|--------------------------------------------------------|----------------------------------------|-------------------------------|----------------------------------------|-------------------------------------------|
| <b>This-work</b> | <b>C-LaMnO<sub>3</sub></b>                             | 0.52                                   | <b>290</b>                    | <b>66.21</b>                           | <b>This-work</b>                          |
| Ref. 1           | LaCoO <sub>3</sub>                                     | 0.142                                  | 420                           | 140                                    | J. AlloysCompd. 2017, 725, 260.           |
| Ref. 2           | LaFeO <sub>3</sub>                                     | 0.407                                  | 466                           | 90                                     | Angew. Chem. Int. Ed. 2019,18.            |
| Ref.3            | NdFeO <sub>3</sub>                                     | N/A                                    | 370                           | 79                                     | Int. J. Hydrogen Energy. 2022, 47, 14542. |
| Ref.4            | BaLa <sub>2</sub> MnS <sub>5</sub>                     | N/A                                    | 338                           | 108                                    | J. Chin. Chem. Soc. 2024, 71, 1008.       |
| Ref.5            | LaNiO <sub>3</sub> /C                                  | 0.250                                  | 426                           | 119                                    | Chem. 2019, 7, 2019.                      |
| Ref.6            | LaCoO <sub>3</sub>                                     | N/A                                    | 470                           | 180                                    | Chem. 2017. 3. 812.                       |
| Ref.7            | LaFeO <sub>3</sub>                                     | 0.255                                  | 430                           | 157                                    | ACS Appl. Mater. Inter. 2020, 12, 4125963 |
| Ref.8            | La <sub>0.6</sub> Sr <sub>0.4</sub> CoO <sub>3-δ</sub> | N/A                                    | 420                           | 99                                     | Electrochim. Acta. 2019, 327, 135033 49   |
| Ref.9            | LaCoO <sub>3</sub>                                     | 0.25                                   | 450                           | 144                                    | Energy Storage Mater. 2021, 42, 470 68    |
| Ref.10           | SrCo <sub>0.9</sub> Ru <sub>0.1</sub> O <sub>3-δ</sub> | N/A                                    | 360                           | 113                                    | Small 2019, 15, 1903120                   |

**Table S2.** Parameters of LMO from Rietveld refinement.

|          | O-LMO | H-LMO | C-LMO |
|----------|-------|-------|-------|
| $\chi^2$ | 1.91  | 1.98  | 1.90  |
| $R_{wp}$ | 5.23% | 4.23% | 5.0%  |
| $R_p$    | 3.84% | 3.08% | 3.75% |



**Table S3.** Detailed lattice parameters of O-LMO, H-LMO and C-LMO.

|                    |                    | O-LMO                 | H-LMO                 | C-LMO                |
|--------------------|--------------------|-----------------------|-----------------------|----------------------|
| Space group        |                    | Pnma                  | R-3c:H                | Pm-3m                |
| Lattice parameters | a                  | 5.565Å                | 5.529Å                | 3.887Å               |
|                    | b                  | 8.031Å                | 5.529Å                | 3.887Å               |
|                    | c                  | 5.563Å                | 13.366Å               | 3.887Å               |
|                    | $\alpha$           | 90°                   | 90°                   | 90°                  |
|                    | $\beta$            | 90°                   | 90°                   | 90°                  |
|                    | $\gamma$           | 90°                   | 120°                  | 90°                  |
|                    | V(Å <sup>3</sup> ) | 248.678Å <sup>3</sup> | 353.949Å <sup>3</sup> | 58.763Å <sup>3</sup> |
